1           **The effect of feeding behavior of *Monochamus alternatus* (Coleoptera:**  
2           **Cerambycidae) on the departure of pine wood nematode, *Bursaphelenchus***  
3                           ***xylophilus* (Nematoda: Aphelenchoididae)**

4  
5   Yang Wang<sup>1,2</sup>, Fengmao Chen<sup>1,2\*</sup>, Lichao Wang<sup>1,2</sup>, Lifeng Zhou<sup>1,2</sup> and Juan Song<sup>1,2</sup>

6   <sup>1</sup>Collaborative Innovation Center of Sustainable Forestry in Southern China, College of Forestry,  
7   Nanjing Forestry University, Nanjing 210037, China;

8   <sup>2</sup>Institute of Forest Protection, College of Forestry, Nanjing Forestry University, Nanjing 210037,  
9   China;

10   \*E-mail: [cfengmao@njfu.edu.cn](mailto:cfengmao@njfu.edu.cn) (for correspondence)

11

12   **KEYWORDS:** departure, feeding, lipid, *Monochamus alternatus*, motility, pine  
13   wood nematode

14   **SUMMARY STATEMENT**

15   The feeding behavior of *Monochamus alternatus* has no effect on the departure of  
16   pine wood nematodes, but the respiration of *Monochamus alternatus* may be the  
17   cause.

18   **ABSTRACT**

19       In order to study the causes of pine wood nematode (PWN) departure from  
20   *Monochamus alternatus*, the effects of the feeding behavior of *M. alternatus* on the  
21   start date of departure of PWN were studied. The start date of the departure of PWN  
22   carried by the directly fed *M. alternatus* was 5–13 d after beetle emergence, mainly  
23   concentrated within 6–10 d, with a mean ( $\pm$ SD) of  $8.02 \pm 1.96$  d. The start date of the  
24   departure of PWN carried by the *M. alternatus* fed after starvation was 5–14 d after  
25   beetle emergence, mainly concentrated within 6–9 d, with a mean of  $7.76 \pm 2.28$  d.  
26   The results show that there was no significant difference in the start departure date of  
27   PWN between the two treatments. This show that the feeding behavior, subsequent  
28   metabolic changes caused by feeding behavior of *M. alternatus* and pine volatiles  
29   were not the triggers for PWN departure. At the same time, it was found that the

30 motility of the PWN carried by *M. alternatus* at 8 d after emergence was significantly  
31 greater than that of the PWN carried by the newly emerged *M. alternatus*. And the  
32 PWN carried by *M. alternatus* at 8 d after emergence more easily extracted than the  
33 PWN carried by newly emerged beetles. Greater motility PWN were easier departure  
34 from *M. alternatus*.

## 35 INTRODUCTION

36 Pine Wilt Disease (PWD) constitutes one of the most serious conifer diseases  
37 worldwide, affecting *Pinus* spp. from the Far East forestlands (Japan, China and  
38 Korea) (Cheng et al., 1983; Yi et al., 1989), and from Europe (Portugal and Spain)  
39 (Abelleira et al., 2011; Fonseca et al., 2012; Mota et al., 1999; Robertson et al., 2011).  
40 This disease causes significant economic and environmental damage to the countries  
41 affected, with large annual losses of timber (Mamiya et al., 2004), increased costs in  
42 management procedures, including disease and pest control (Mamiya et al., 2004;  
43 Yang et al., 2004). This disease is caused by the pine wood nematode (PWN),  
44 *Bursaphelenchus xylophilus* (Steiner & Buhner) Nickle, and PWN transmission is  
45 dependent on vector insects, the main vector insect in East Asia is *Monochamus*  
46 *alternatus* Hope (Linit, 1989; Morimoto and Iwasaki, 1972). There are two  
47 developmental forms in the life cycle of the PWN, namely the propagative and  
48 dispersal forms. Under favorable conditions, PWN molt into their propagative form,  
49 and then reproduce rapidly (Mamiya, 1984; Wingfield, 1983). However, under  
50 unfavorable conditions, e.g. high population density, starvation, and high temperature,  
51 the propagative second-stage juveniles will molt to produce dispersal third-stage  
52 juveniles, which will aggregate around the pupal chamber of the vector insects (Linit,  
53 1988; Zhao et al., 2014). The dispersal third-stage juveniles molt to produce  
54 fourth-stage juveniles, which enter the tracheal system of the vector as the beetles  
55 emergence (Linit, 1988,1990; Necibi and Linit, 1998; Zhao et al., 2014), the  
56 fourth-stage dispersal juveniles to be transmitted to the healthy pine trees through  
57 wounds caused by the vector (Niu et al., 2012; Stamps and Linit,1988,2001; Zhao et  
58 al., 2007).

59 The PWN cannot be transmitted immediately after the emergence of *M.*  
60 *alternatus*. A number of studies have investigated the time after *M. alternatus*  
61 emergence when the PWN transmission starts. Fourth-stage dispersal juveniles exit  
62 the tracheal system of *M. alternatus* at 3–5 d after emergence (Hosoda and Kobayashi,  
63 1977), or at 5 d after emergence (Jikumaru and Togashi, 2000), or at 7 d after  
64 emergence (Aikawa, 2008), others observed that *M. alternatus* started to transmit  
65 PWN at 7–12 d after emergence (Wang et al. 2019), or at 10 d after emergence  
66 (Togashi, 1985), or within 10 d after the emergence of the beetle (Enda, 1972).

67 What causes the departure of PWN from its insect host? A number of studies have  
68 tried to investigate the factors: the degradation of neutral storage lipid was correlated  
69 with nematode exit (Stamps and Linit, 1988), assumed  $\beta$ -myrcene to play an  
70 important role in the transmigration of the PWN from the sawyer to the pine tree  
71 (Ishkawa et al., 1986), PWN has a trait of spontaneous departure from *M. alternatus*,  
72 pine volatiles repress PWN departure from *M. alternatus*(Aikawa and Togashi, 1998),  
73 PWN departure behavior possibly endogenous nature factors (Aikawa and Togashi,  
74 1998; Stamps and Linit, 1988), when CO<sub>2</sub> concentration in the trachea reaches a  
75 certain critical value, PWN begins to escape from beetle (Wu et al., 2019). The  
76 feeding period of *M. alternatus* is an important stage in the life cycle of the beetles as  
77 well as a key step in PWN transmission (Yoshimura et al., 1999; Togashi and  
78 Shigesada, 2006). Whether the feeding behavior of *M. alternatus* is the factor of PWN  
79 departure has not been studied. In order to further study the causes of PWN departure  
80 from *M. alternatus*, we investigated the effect of the feeding behavior of beetle on  
81 PWN departure, the differences in motility and difficulty level of extracted between  
82 the PWN carried by *M. alternatus* at 8 d after emergence and newly emerged.

## 83 **RESULTS**

### 84 **Effect of beetle feeding behavior on PWN departure from *M. alternatus***

85 Data from the study into the time after *M. alternatus* emergence required for  
86 PWN start departure from beetles are shown in Table 1. It can be seen from the table  
87 that the mean start time for PWN departure from directly fed *M. alternatus* was 8.02 ±

88 1.96 d after beetle emergence, and there was no significant difference between male  
 89 and female beetles fed directly ( $P=0.47$ ). The mean start time for PWN departure  
 90 from *M. alternatus* fed after starvation was  $7.76 \pm 2.28$  d after beetle emergence, with  
 91 no significant difference between male and female beetles ( $P=0.19$ ). There was no  
 92 significant difference in the time that PWN started to departure from the beetles under  
 93 the two feeding regimes ( $P=0.34$ ), with no significant differences in the start time of  
 94 PWN departure from female ( $P=0.58$ ) or male ( $P=0.12$ ) beetles under the two feeding  
 95 regimes.

96 **Table 1. The start date of PWN departure from *Monochamus alternatus***

| Treatment                                            | Direct feeding |    | Feeding after starvation |    |
|------------------------------------------------------|----------------|----|--------------------------|----|
| Sex of insects                                       | ♀              | ♂  | ♀                        | ♂  |
| Days after emergence of <i>Monochamus alternatus</i> | 5              | 6  | 5                        | 5  |
|                                                      | 6              | 6  | 6                        | 6  |
|                                                      | 6              | 6  | 6                        | 6  |
|                                                      | 6              | 6  | 6                        | 6  |
|                                                      | 7              | 6  | 6                        | 6  |
|                                                      | 7              | 6  | 6                        | 6  |
|                                                      | 7              | 7  | 6                        | 6  |
|                                                      | 7              | 7  | 7                        | 6  |
|                                                      | 7              | 7  | 7                        | 7  |
|                                                      | 7              | 8  | 7                        | 7  |
|                                                      | 7              | 9  | 7                        | 7  |
|                                                      | 7              | 9  | 8                        | 8  |
|                                                      | 7              | 9  | 8                        | 9  |
|                                                      | 8              | 10 | 9                        | 9  |
|                                                      | 8              | 10 | 9                        | 9  |
|                                                      | 9              | 10 | 9                        | 12 |
|                                                      | 9              | 11 | 10                       |    |
| 9                                                    | 12             | 11 |                          |    |

|                         |                 |                 |                 |                 |
|-------------------------|-----------------|-----------------|-----------------|-----------------|
|                         | 10              | 12              | 12              |                 |
|                         | 10              |                 | 13              |                 |
|                         | 10              |                 | 14              |                 |
|                         | 13              |                 |                 |                 |
| Average (mean $\pm$ SD) | 7.82 $\pm$ 1.82 | 8.26 $\pm$ 2.13 | 8.19 $\pm$ 2.54 | 7.19 $\pm$ 1.80 |
|                         | 8.02 $\pm$ 1.96 |                 | 7.76 $\pm$ 2.28 |                 |

97

98 The start date of PWN departure from *M. alternatus* fed directly was mainly  
99 concentrated in the period 6–10 d after emergence, which thirty-six *M. alternatus*  
100 accounted for 87.8% of the total. The start date of departure of PWN from *M.*  
101 *alternatus* fed after a starvation treatment was mainly concentrated in the period 6–9 d  
102 after emergence, which twenty-nine *M. alternatus* accounted for 78.4% of the total.  
103 There was no significant difference between the two treatments in peak period of  
104 PWN start departure from beetles ( $P = 0.078$ ).

105 These results indicated that the feeding behavior of *M. alternatus* had no  
106 significant effect on the departure of PWN. It also suggest that the consequent  
107 metabolic changes caused by feeding behavior and volatiles from pine twigs had no  
108 effect on the departure of PWN (When the beetles were treated with starvation, they  
109 were not stimulated by volatiles.).

110

### 111 **Comparisons of nematode motility**

112 The effect of beetle feeding behavior on the motility of the PWN carried by the  
113 beetles is shown in supplementary video 1 (the motility of the PWN carried by the  
114 newly emerged *M. alternatus*) and video 2 (the motility of the PWN carried by the  
115 beetles at 8 d after emergence).

116 After dark treatment for 15 minutes (simulate conditions in the body of the  
117 beetle), the PWN carried by the newly emerged beetles were less motility than the  
118 PWN carried by the beetles at 8 d after emergence ((starvation beetles have the same  
119 results). At the same time, it was found that the PWN carried by *M. alternatus* at 8 d

120 after emergence were easier to extracted (starvation beetles have the same results)  
 121 than the PWN carried by the newly emerged beetles (Table 2). A higher proportion of  
 122 PWN being collected within 12 h than from the newly emerged beetles ( $P < 0.01$ ).  
 123 These suggests greater motility PWN were easier departure from *M. alternatus*.

124

125

126

Table 2 The percentage of PWN in different extracted periods

|                                  | NO. | The time of PWN collected |      |      |
|----------------------------------|-----|---------------------------|------|------|
|                                  |     | 12 h                      | 24 h | 36 h |
| Newly emerged beetles            | 1   | 29%                       | 50%  | 21%  |
|                                  | 2   | 35%                       | 53%  | 12%  |
|                                  | 3   | 26%                       | 49%  | 25%  |
|                                  | 4   | 38%                       | 49%  | 13%  |
|                                  | 5   | 25%                       | 61%  | 14%  |
|                                  | 6   | 29%                       | 46%  | 25%  |
|                                  | 7   | 41%                       | 40%  | 19%  |
|                                  | 8   | 27%                       | 51%  | 22%  |
|                                  | 9   | 33%                       | 51%  | 16%  |
|                                  | 10  | 31%                       | 55%  | 14%  |
| Beetles at 8 day after emergence | 11  | 80%                       | 15%  | 5%   |
|                                  | 12  | 84%                       | 11%  | 5%   |
|                                  | 13  | 91%                       | 6%   | 3%   |
|                                  | 14  | 81%                       | 13%  | 6%   |
|                                  | 15  | 77%                       | 16%  | 7%   |
|                                  | 16  | 75%                       | 17%  | 9%   |
|                                  | 17  | 72%                       | 20%  | 8%   |
|                                  | 18  | 81%                       | 15%  | 4%   |
|                                  | 19  | 83%                       | 12%  | 5%   |
|                                  | 20  | 70%                       | 23%  | 7%   |

---

|      |     |     |     |
|------|-----|-----|-----|
| mean | 31% | 51% | 18% |
|      | 79% | 15% | 6%  |

---

127

## 128 **DISCUSSION**

129       A number of studies have investigated the cause which affect PWN departure  
130 from beetles, although there were differences in the results. Stamps et al. reported that  
131 neutral storage (NS) lipid was correlated with nematode exit and may contribute to  
132 PWN exit from vectors(Stamps and Linit, 1988). A rolling fulcrum model of the  
133 integration of intrinsic (NS lipid) and extrinsic (volatiles) cues is proposed to explain  
134 the behavioural ontogeny of fourth-stage dispersal juveniles in relation to the beetle  
135 vector (Stamps and Linit, 2001). Neutral storage (NS) lipid content is proposed as a  
136 modifier of PWN response to beetle and tree-produced volatiles, with the lowest NS  
137 lipid content were attracted to  $\beta$ -myrcene, a pine volatile, while PWN with the highest  
138 NS lipid content were attracted to toluene, a beetle cuticular hydrocarbon (Stamps and  
139 Linit, 1998, 2001). Ishkawa et al. (1986) examined the attractant effect of volatile  
140 components in *Pinus densiflora*, to the PWN (dispersal nematodes that leave *M.*  
141 *alternatus*), and assumed that  $\beta$ -myrcene play an important role in the transmigration  
142 of the PWN from the sawyer to the pine tree and for the movement of the PWN inside  
143 the pine wood. However, in the present study, we believe that volatiles were not the  
144 cause of PWN departure from *M. alternatus*.

145       Provided autoclaved or fresh pine twigs to the beetles respectively. Consequently,  
146 it was suggested that PWN had a trait of spontaneous departure from *M. alternatus*  
147 and that the volatiles from fresh *P. densiflora* twigs repressed PWN departure from *M.*  
148 *alternatus* (Aikawa and Togashi, 1998). Stamps and Linit (1988), examined the  
149 effects of various pine volatiles on PWN departure, suggested that PWN exit behavior  
150 possibly controlled by endogenous nature factors. Volatiles thought to be attractants  
151 may actually act more as aggregation stimulants than as attractants, with PWN  
152 moving randomly until the desired chemical is reached, whereupon movement  
153 decreases or stops (Futai, 1980; Stamps and Linit, 1998). Volatiles may only play a

154 role in fourth-stage dispersal juveniles movement from beetles into pine once the  
155 nematodes have physically dropped onto the tree surface (Stamps and Linit, 1988,  
156 1998).

157 In the present study, feeding behavior of the beetles had no significant effect on  
158 the PWN departure from *M. alternatus*. The results also indicated that volatiles of  
159 pine and the metabolic changes of *M. alternatus* caused by feeding had no effect on  
160 the departure of PWN. The two main behaviors of *M. alternatus* following emergence  
161 are feeding and breathing. Wu et al. reported that the metabolic and respiratory rates  
162 of *M. alternatus* after emergence were increased by feeding. This led to a rise in CO<sub>2</sub>  
163 concentration in the trachea of *M. alternatus*. When the CO<sub>2</sub> concentration in trachea  
164 reached a certain critical level, PWN began to escape from beetle (Wu et al., 2019). In  
165 the present study, we observed that the PWN carried by the newly emerged beetles  
166 were less motility than the PWN carried by the beetles at 8th d after emergence, and  
167 the PWN carried by *M. alternatus* at 8 d after emergence were easier to extracted than  
168 the PWN carried by newly emerged beetles, suggest that the departure of PWN from  
169 host might be related to their motility. PWN movement requires energy, lipid  
170 degradation provides the energy needed for exercise (Stamps and Linit, 1988,1998),  
171 and lipid fully degradation to produce large amounts of energy requires sufficient O<sub>2</sub>.  
172 Respiratory behavior leads to a critical level of CO<sub>2</sub> in the trachea of *M. alternatus*  
173 (Wu et al., 2019), meanwhile the O<sub>2</sub> concentration in the beetle trachea will also reach  
174 a critical level when breathing (the concentration of O<sub>2</sub> will increase when inhaling).  
175 May be PWN which in the trachea of the beetle receive sustained stimulation of high  
176 concentration of O<sub>2</sub>, which leads to lipid degradation and expression of motor-related  
177 genes, and ultimately leads to increased motility of PWN. The departure may be  
178 caused by strong motility of PWN to avoid CO<sub>2</sub> (Wu et al., 2019) or to move toward  
179 high-O<sub>2</sub> conditions.

180 Tian et al. (2017) carried out analysis of metabolism related genes and showed that  
181 the metabolic level of fourth-stage dispersal juveniles (carried by newly emerged  
182 beetles) was much lower than third-stage dispersal juveniles. This was due to the  
183 decrease in enzymatic activity in those pathways involving metabolism of glycolysis,



184 oxidative phosphorylation, the tricarboxylic acid cycle, gluconeogenesis,  
185 etc.(O’Riordan and Burnell, 1989). The expression of sorbitol dehydrogenase gene in  
186 the fourth-stage dispersal juveniles (carried by newly emerged beetles) was  
187 up-regulated (Tian et al., 2017), this enzyme may be involved in ethanol fermentation  
188 under anaerobic conditions (Mcelwee et al., 2006) provides basic energy for PWN.  
189 These indicated that the PWN were in a hypoxic environment in the early stage after  
190 entering the trachea of *M. alternatus*. In the present study greater motility PWN  
191 (carried by *M. alternatus* at 8 d after emergence) were easier departure from *M.*  
192 *alternatus*. Greater motility showed that PWN had a strong metabolism and abundant  
193 energy. A large amount of lipids metabolism after a period of emergence of the beetle  
194 (Stamps and Linit, 1988), and Oxidative phosphorylation requires sufficient oxygen  
195 sustained stimulation. The respiration of the adult beetle may provide sufficient  
196 oxygen to PWN. In summary, our view is that may be the respiration of the adult  
197 beetle causes the increase in O<sub>2</sub> concentration in the trachea, which causes the  
198 degradation of lipid to produce energy which increased the mobility of PWN,  
199 eventually triggers the departure of PWN from insect host, with to avoid CO<sub>2</sub>  
200 (Bretscher et al., 2008; Wu et al., 2019) or to move toward high-O<sub>2</sub> directions.  
201 Related molecular mechanisms are under investigation.

## 202 **MATERIALS AND METHODS**

### 203 **Collection of infected wood and *M. alternatus***

204 In March 2019, dead specimens *Pinus massoniana* trees, infested by *M.*  
205 *alternatus* larvae and PWN, were collected at Bocun Forest Farm, Huangshan City,  
206 Anhui Province in eastern China. The pine trees were cut into logs (1.0–1.2 m in  
207 length) and maintained in outdoor insect cages (0.5 m × 0.5 m × 1.2 m), as shown in  
208 Fig. 1 A. *Monochamus alternatus* were collected daily (every 6 h) during the period  
209 of adult beetles emergence from the logs.

210 The collected *M. alternatus* were divided into two groups and maintained in  
211 tissue culture flasks at 25°C, one of which was fed (with fresh one-year-old pine twigs  
212 with the needles removed) immediately after collection (“direct feeding”), whereas

213 the second group was fed after a starvation period of 4 d (The mortality rate of the  
214 beetle for more than 4 d was very high.). In the present study, 41 *M. alternatus* were  
215 fed immediately and 37 were fed after a starvation period, the feeding of the beetles is  
216 shown in Fig. 1 B.

217

### 218 **Extraction and counting of PWN**

219 The twigs (with the pine needles removed) of *P. massoniana* were replaced daily.  
220 The twigs had been fed by the beetles were cut into pieces and the PWN were  
221 extracted using Bellman funnel method ( Baermann, 1917). Twenty-four hours after  
222 extraction, the suspension at the bottom of the funnel was collected with a 10 ml  
223 centrifuge tube. The number of PWN was counted with a microscope (Zeiss Axio Lab,  
224 A1, Carl Zeiss, Gottingen, GERMANY) under 10×4 field.

### 225 **PWN motility and extraction percentage observations**

226 PWN were extracted from newly emerged *M. alternatus* and at 8 d after  
227 emergence (PWN were collected every 4 hours). The PWN were washed with sterile  
228 water and treated in the dark for 10 minutes. Then the motility of PWN was observed  
229 under a microscope (Zeiss Axio Imager.M2, Carl Zeiss, Gottingen, GERMANY) and  
230 videos were taken (Zeiss AxioCam HRc).

231 Extracted PWN from 10 *M. alternatus* at 8 d after emergence and 10 newly  
232 emerged *M. alternatus*, respectively. And calculated the percentage of PWN in  
233 different extracted periods (0–12 h, 12–24 h, 24–36 h) accounted for the total  
234 extraction.

### 235 **Statistical analysis**

236 Statistical analysis was performed using SPASS 19.0 (IBM, Armonk, NY, USA).  
237 One-way analysis of variance (ANOVA) was used to analyze the differences of the  
238 start departure time of PWN between *M. alternatus* feeding after starvation and direct  
239 feeding. Mann-Whitney test was performed to analysis the difference of difficulty  
240 level of extracted between the PWN carried by *M. alternatus* at 8 d after emergence  
241 and newly emerged.

242

243 **ACKNOWLEDGEMENT**

244 This study was supported by the Funding information the National Key R&D  
245 Program of China, Grant/Award Number: 2017YFD0600104.

246 **CONFLICTS OF INTEREST**

247 The authors declare no conflict of interest. The sponsors had no role in the design,  
248 execution, interpretation, or writing of the study

249

250 **REFERENCES**

- 251 Abelleira, A., Picoaga, A., Mansilla, J. P., and Aguin, O. (2011). Detection of  
252 *Bursaphelenchus xylophilus*, Causal Agent of Pine Wilt Disease on Pinus  
253 pinaster in Northwestern Spain. *Plant Dis.* 95(6), 776.
- 254 Aikawa, T. (2008). Transmission biology of *Bursaphelenchus xylophilus* in relation to  
255 its insect vector. Pine Wilt Disease, pp 123-138. Springer.
- 256 Aikawa, T. and Togashi, K. (1998). An effect of pine volatiles on departure of  
257 *Bursaphelenchus xylophilus* (Nematoda: Aphelenchoididae) from *Monochamus*  
258 *alternatus* (Coleoptera: Cerambycidae). *Appl. Entomol. Zoolog.* 33(2), 231-237.
- 259 Baermann, G. (1917). Eine einfache methode Zur Auffindung von Ankylostomum  
260 (Nematoden) larven in Erdproben. *Geneesk. Tydschr. Nederl. Indie.* 57, 131-137.
- 261 Bretscher, A. J., Busch, K. E. and De Bono, M. (2008). A carbon dioxide avoidance  
262 behavior is integrated with responses to ambient oxygen and food in  
263 *Caenorhabditis elegans*. *Proc. Natl. Acad. Sci. U S A.* 105(23), 8044-8049.
- 264 Cheng, H., Lin, M., Li, W. and Fang, Z. (1983). The occurrence of a pine wilting  
265 disease caused by a nematode found in Nanjing. *For Pest Dis.* 4, 1-5.
- 266 Enda, N. (1972). Removing dauer larvae of *Bursaphelenchus lignicolus* from the body  
267 of *Monochamus alternatus*. *Kanto. Branch. Jpn. For. Soc.* 32.
- 268 Fonseca, L., Cardoso, J., Lopes, A., Pestana, M., Abreu, F., Nunes, N., et al. (2012).  
269 The pinewood nematode, *Bursaphelenchus xylophilus*, in Madeira Island.  
270 *Helminthologia.* 49(2), 96-103.
- 271 Futai, K. (1980). Host Preference of *Bursaphelenchus lignicolus* (Nematoda :

- 272 Aphelenchoididae) and *B. mucronatus* Shown by their aggregation to Pine Saps.  
273 *Appl. Entomol. Zool.* 15(3), 193-197.
- 274 Hosoda, R. and Kobayashi, K. (1977). Drop off procedures of the pine wood  
275 nematode from the pine sawyer. *Kanto. Branch. Jpn. For. Soc.* 255-258.
- 276 Ishkawa, M., Shuto, Y. and Watanabe, H. (1986).  $\beta$ -Myrcene, a potent attractant  
277 component of pine wood for the pine wood nematode, *Bursaphelenchus*  
278 *xylophilus*. *Agric. Bioi. Chem.* 50(7), 1863-1866.
- 279 Jikumaru, S. and Togashi, K. (2000). Temperature effects on the transmission of  
280 *Bursaphelenchus xylophilus* (Nemata: Aphelenchoididae) by *Monochamus*  
281 *alternatus* (Coleoptera: Cerambycidae). *J. Nematol.* 32(1), 110-116.
- 282 Linit, M. J. (1988). Nematode-vector relationships in the pine wilt disease system. *J.*  
283 *Nematol.* 20(2), 227-235.
- 284 Linit, M. J. (1989). Temporal pattern of pinewood nematode exit from the insect  
285 vector *Monochamus carolinensis*. *J. Nematol.* 21(1), 105.
- 286 Linit, M. J. (1990). Transmission of pinewood nematode through feeding wounds of  
287 *Monochamus carolinensis* (Coleoptera: Cerambycidae). *J. Nematol.* 22(2), 231.
- 288 Mamiya, Y., Mota, M. and Vieira, P. (2004). Pine wilt disease in Japan. The pinewood  
289 nematode, *Bursaphelenchus xylophilus* an international workshop, University of  
290 Évora, Portugal, August.
- 291 Mamiya, Y.(1984). The pine wood nematode. *Helminthologia.* 49(2), 96-103.
- 292 Mcelwee, J.J., Eugene, S., Eric, B., Janet, T. and David, G. (2006).  
293 Diapause-associated metabolic traits reiterated in long-lived daf-2 mutants in the  
294 nematode *Caenorhabditis elegans*. *Mech. Ageing. Dev.* 127(5), 458-472.
- 295 Mota, M. M., Braasch, H., Bravo, M. A. and Penas, A.C., Burgermeister, W., Metge  
296 K., et al. (1999). First report of *Bursaphelenchus xylophilus* in Portugal and in  
297 Europe. *Nematology.* 1(1), 727-734.
- 298 Morimoto, K., Iwasaki, A. (1972). Role of *Monochamus alternatus* (Coleoptera :  
299 Cerambycidae) as a vector of *Bursaphelenchus lignicolus* (Nematoda :  
300 Aphelenchoididae). *J. Jpn. For. Soc.* 54(6), 177-183.
- 301 Necibi, S., Linit, M. J. (1988). Effect of *Monochamus carolinensis* on

- 302 *Bursaphelenchus xylophilus* dispersal stage formation. *J. Nematol.* 30(2),  
303 246-254.
- 304 Niu, H., Zhao, L., Lu, M., Zhang, S. and Sun J. (2012). The ratio and concentration of  
305 two monoterpenes mediate fecundity of the pinewood nematode and growth of  
306 its associated fungi. *Plos. One.* 7(2), e31716.
- 307 O'Riordan, V. B. and Burnell, A. M. (1989). Intermediary metabolism in the dauer  
308 larva of the nematode *Caenorhabditis elegans*-1. Glycolysis, gluconeogenesis,  
309 oxidative phosphorylation and the tricarboxylic acid cycle. *Comp. Biochem.*  
310 *Physiol. B-Comp. Biol.* 92(2), 233-238.
- 311 Robertson, L., Arcos, S. C., Escuer, M., Merino, R. S., Esparrago, G., Abelleira, A., et  
312 al. (2011). Incidence of the pinewood nematode *Bursaphelenchus xylophilus*  
313 Steiner & Buhner, 1934 (Nickle, 1970) in Spain. *Nematology.* 13(6), 755-757.
- 314 Stamps, W. T. and Linit, M. J. (1998). Chemotactic response of propagative and  
315 dispersal forms of the pinewood nematode *Bursaphelenchus xylophilus* to beetle  
316 and pine derived compounds. *Fundam. appl. Nematol.* 21(3), 243-250.
- 317 Stamps, W. T. and Linit, M. J. (2001). Interaction of intrinsic and extrinsic chemical  
318 cues in the behaviour of *Bursaphelenchus xylophilus* (Aphelenchida :  
319 Aphelenchoididae) in relation to its beetle vectors. *Nematology.* 3(4), 295-301.
- 320 Stamps, W. T. and Linit, M. J. (1988). Neutral storage lipid and exit behavior of  
321 *Bursaphelenchus xylophilus* fourth- stage dispersal juveniles from their beetle  
322 vectors. *J. Nematol.* 30(2), 255-261.
- 323 Tian, H., Zhang, S., Liu, X., Zhang, Z. and Zhao, L. (2017). Comparative analysis of  
324 dispersal and propagative larval stages in the pinewood nematode  
325 (*Bursaphelenchus xylophilus*) based on a digital gene expression library. *J. Bios.*  
326 26(2), 111-121.
- 327 Togashi, K. (1985). Transmission curves of *Bursaphelenchus xylophilus* (Nematoda:  
328 Aphelenchoididae) from its vector, *Monochamus alternatus* (Coleoptera:  
329 Cerambycidae), to pine trees with reference to population performance. *Appl.*  
330 *Entomol. Zoolog.* 20, 246-251.
- 331 Togashi, K. and Shigesada, N.(2006). Spread of the pinewood nematode vectored by

332 the Japanese pine sawyer: modeling and analytical approaches. *Popul. Ecol.*  
333 48(4), 271-283.

334 Wang, Y., Chen, F. M., Zhou, Q., Zhou, L. F. and Sun, S. H. (2019). Transmission of  
335 the pine wood nematode, *Bursaphelenchus xylophilus* (Nematoda:  
336 Aphelenchoididae), through feeding activity of *Monochamus alternatus*  
337 (Coleoptera: Cerambycidae). *J. Nanjing. For. Univ.* 43(6), 1-10.

338 Wingfield, M. J. (1983). Transmission of pine wood nematode to cut timber and  
339 girdled trees. *Plant Dis.* 67(1), 35-37.

340 Wu, Y. X., Wickham, J. D., Zhao, L. L. and Sun, J. J. (2019). CO<sub>2</sub> drives the pine  
341 wood nematode off its insect vector. *Curr. Biol.* 29(13), R619-R620.

342 Yang, B. J., Mota, M. and Vieira, P. (2014). The history, dispersal and potential threat  
343 of pine wood nematode in China. The pinewood nematode, *Bursaphelenchus*  
344 *xylophilus* Nematology Monographs and Perspectives, pp. 21-24. The  
345 Netherlands: Brill Academica Publishers.

346 Yi, C. K., Byun, B. H., Park, J. D., Yang, S. I. and Chang, K. H. (1989). First finding  
347 of the pine wood nematode, *Bursaphelenchus xylophilus* (Steiner et Buhner)  
348 Nickle and its insect vector in Korea. *Res. Rep. For. Res. Ins. Seoul.* 38, 141-149.

349 Yoshimura, A., Kawasaki, K., Takasu, F., Togashi, K., Futai, K. and Shigesada, N.  
350 (1999). Modeling the spread of pine wilt disease caused by nematodes with pine  
351 sawyer as vector. *Ecology.* 80(5), 1691-1702.

352 Zhao, L. L., Wei, W., Kang, L. and Sun, J. H. (2007). Chemotaxis of the pinewood  
353 nematode, *Bursaphelenchus xylophilus*, to volatiles associated with host pine,  
354 *Pinus massoniana*, and its vector *Monochamus alternatus*. *J. Chem. Ecol.* 33(6),  
355 1207-16.

356 Zhao, L., Mota, M., Vieira, P., Butcher, R. A. and Sun, J. (2014). Interspecific  
357 communication between pinewood nematode, its insect vector, and associated  
358 microbes. *Trends Parasitol.* 30(6), 299.

359  
360  
361

362

363

364

365

366

367

368

369

370 **FIGURE**

371

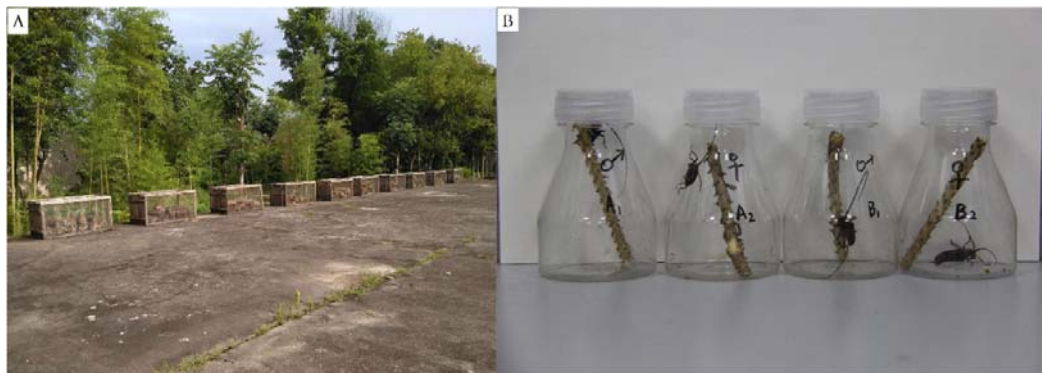

372

373

**Fig. 1 Collection and feeding of *Monochamus alternatus***

374 A: The pine trees were cut into logs and maintained in outdoor insect cages. *Monochamus alternatus*

375 were collected daily (every 6 h) during the period of adult beetles emergence. B: The collected *M.*

376 *alternatus* were divided into two groups and maintained in tissue culture flasks at 25°C, one of which

377 was fed (with fresh one-year-old pine twigs with the needles removed) immediately after collection,

378 whereas the second group was fed after a starvation period of 4 d.

379
